# Supplementary material for: Lipophilicity, Pharmacokinetic Properties, and Molecular Docking Study on SARS-CoV-2 Target for Betulin Triazole Derivatives with Attached 1,4-Quinone
Source: MDPI journal article supplement (doi:10.3390/pharmaceutics13060781), 2021-05-23

# Supplementary Materials: Lipophilicity, Pharmacokinetic Properties, and Molecular Docking Study on SARS-CoV-2 Target for Betulin Triazole Derivatives with Attached 1,4-Quinone

Monika Kadela-Tomanek, Maria Jastrzębska, Krzysztof Marcieniec, Elwira Chrobak <sup>1</sup>, Ewa Bębenek and Stanisław Boryczka

## Table of Contents

|                                                                                                                                                         |    |
|---------------------------------------------------------------------------------------------------------------------------------------------------------|----|
| Table S1. The experimental of lipophilicity ( $\log P_{TLC}$ ) and hydrophobic index ( $\phi_0$ ) for compounds <b>1–20</b> .                           | 2  |
| Table S2. The calculated lipophilicity for compounds <b>1–20</b> .                                                                                      | 2  |
| Table S3. The experimental and predicted $\log P$ .                                                                                                     | 3  |
| Table S4. The local minima of hybrids <b>1–16</b> .                                                                                                     | 3  |
| Table S5. Interaction of hybrids <b>1, 2, 6, 9, 10, 11</b> and <b>14</b> with active site of Mpro and PL protein.                                       | 4  |
| Figure S1. The optimized structure of hybrids <b>1–16</b> .                                                                                             | 6  |
| Figure S2. The linear regression between the experimental and literature lipophilicity for standard substance.                                          | 7  |
| Figure S3. The similarity analysis of pharmacokinetic parameters of hybrids <b>1–16</b> .                                                               | 7  |
| Figure S4. The HOMO and LUMO orbitals for hybrids <b>1–16</b> .                                                                                         | 7  |
| Figure S5. The MEP for hybrids <b>1–16</b> .                                                                                                            | 9  |
| Figure S6. Docking pose of COVID-19 Mpro protein complex with hybrids <b>2</b> (A.), <b>6</b> (B.), <b>10</b> (C.), <b>11</b> (D.), and <b>14</b> (E.). | 10 |
| Figure S7. Docking pose of COVID-19 PLpro protein complex with hybrids <b>1</b> (A.), <b>6</b> (B.), <b>9</b> (C.), and <b>14</b> (D.).                 | 12 |

**Table S1.** The experimental of lipophilicity ( $\log P_{\text{TLC}}$ ) and hydrophobic index ( $\phi_0$ ) for compounds **1–20**.

| Compound  | $\log P_{\text{TLC}}$ | $\phi_0$ | Compound  | $\log P_{\text{TLC}}$ | $\phi_0$ |
|-----------|-----------------------|----------|-----------|-----------------------|----------|
| <b>1</b>  | 4.56                  | 82.40    | <b>11</b> | 5.26                  | 85.94    |
| <b>2</b>  | 4.71                  | 83.14    | <b>12</b> | 5.56                  | 88.32    |
| <b>3</b>  | 5.08                  | 84.76    | <b>13</b> | 4.87                  | 87.13    |
| <b>4</b>  | 5.21                  | 87.00    | <b>14</b> | 4.93                  | 87.76    |
| <b>5</b>  | 4.61                  | 79.81    | <b>15</b> | 5.35                  | 85.11    |
| <b>6</b>  | 4.64                  | 82.83    | <b>16</b> | 5.77                  | 86.18    |
| <b>7</b>  | 5.20                  | 83.48    | <b>17</b> | 5.57                  | 82.62    |
| <b>8</b>  | 5.39                  | 88.21    | <b>18</b> | 5.73                  | 83.67    |
| <b>9</b>  | 4.72                  | 82.43    | <b>19</b> | 6.33                  | 86.06    |
| <b>10</b> | 4.86                  | 83.85    | <b>20</b> | 6.55                  | 87.13    |

**Table S2.** The calculated lipophilicity for compounds **1–20**.

| Com.      | ALOGPs | AClogP | AlogP | XLOGP2 | XLOGP3 | milogP | iLOGP | WLOGP | MLOGP | SILICOS-IT |
|-----------|--------|--------|-------|--------|--------|--------|-------|-------|-------|------------|
| <b>1</b>  | 6.39   | 6.57   | 7.75  | 9.37   | 10.41  | 7.88   | 5.23  | 8.78  | 4.19  | 7.85       |
| <b>2</b>  | 6.58   | 6.74   | 7.71  | 8.79   | 10.09  | 7.70   | 5.28  | 8.99  | 4.11  | 8.44       |
| <b>3</b>  | 6.83   | 7.06   | 8.13  | 10.11  | 10.99  | 8.46   | 5.53  | 9.36  | 4.48  | 8.4        |
| <b>4</b>  | 7.09   | 7.52   | 8.80  | 10.39  | 11.46  | 8.67   | 6.07  | 9.75  | 4.64  | 8.82       |
| <b>5</b>  | 6.26   | 6.47   | 7.32  | 9.28   | 10.08  | 8.43   | 5.56  | 8.78  | 4.19  | 7.85       |
| <b>6</b>  | 6.49   | 6.63   | 7.29  | 8.67   | 9.76   | 8.29   | 5.36  | 8.99  | 4.11  | 8.44       |
| <b>7</b>  | 6.71   | 6.96   | 7.70  | 10.02  | 10.65  | 8.80   | 5.68  | 9.36  | 4.48  | 8.40       |
| <b>8</b>  | 6.98   | 7.42   | 8.37  | 10.27  | 11.12  | 8.95   | 6.35  | 9.75  | 4.64  | 8.82       |
| <b>9</b>  | 6.61   | 6.99   | 8.04  | 9.68   | 10.81  | 7.93   | 5.84  | 9.09  | 4.35  | 8.40       |
| <b>10</b> | 6.79   | 7.16   | 8.00  | 9.07   | 10.49  | 7.75   | 5.76  | 9.30  | 4.27  | 8.99       |
| <b>11</b> | 7.02   | 7.48   | 8.41  | 10.42  | 11.39  | 8.49   | 5.90  | 9.66  | 4.64  | 8.95       |
| <b>12</b> | 7.28   | 7.94   | 9.08  | 10.67  | 11.86  | 8.69   | 6.54  | 10.05 | 4.80  | 9.38       |
| <b>13</b> | 6.73   | 7.54   | 8.48  | 10.53  | 11.15  | 8.96   | 5.84  | 9.39  | 5.12  | 8.44       |
| <b>14</b> | 6.89   | 7.71   | 8.44  | 9.92   | 10.83  | 8.89   | 5.72  | 9.60  | 5.04  | 9.02       |
| <b>15</b> | 7.10   | 8.03   | 8.85  | 11.27  | 11.72  | 9.20   | 6.04  | 9.96  | 5.40  | 8.89       |
| <b>16</b> | 7.35   | 8.50   | 9.52  | 11.52  | 12.19  | 9.30   | 6.70  | 10.35 | 5.56  | 9.40       |
| <b>17</b> | 5.38   | 5.26   | 6.49  | 7.81   | 8.22   | 7.05   | 4.89  | 6.84  | 5.30  | 5.84       |
| <b>18</b> | 5.54   | 5.43   | 6.45  | 7.20   | 7.91   | 6.86   | 4.77  | 7.04  | 5.21  | 6.43       |
| <b>19</b> | 5.85   | 5.75   | 6.87  | 8.55   | 8.80   | 7.75   | 5.24  | 7.41  | 5.59  | 6.38       |
| <b>20</b> | 6.17   | 6.21   | 7.54  | 8.80   | 9.27   | 8.11   | 5.74  | 7.80  | 5.76  | 6.80       |

**Table S3.** The experimental and predicted logP.

| Compound | Experimental logP <sub>TLC</sub> | Predicted logP | Residual |
|----------|----------------------------------|----------------|----------|
| 1        | 4.56                             | 4.59           | -0.027   |
| 2        | 4.71                             | 4.64           | 0.064    |
| 3        | 5.08                             | 5.09           | -0.003   |
| 4        | 5.21                             | 5.36           | -0.156   |
| 5        | 4.61                             | 4.59           | 0.024    |
| 6        | 4.64                             | 4.64           | 0.005    |
| 7        | 5.20                             | 5.09           | 0.113    |
| 8        | 5.39                             | 5.36           | 0.024    |
| 9        | 4.72                             | 4.78           | -0.060   |
| 10       | 4.86                             | 4.83           | 0.027    |
| 11       | 5.26                             | 5.27           | -0.016   |
| 12       | 5.56                             | 5.55           | 0.013    |
| 13       | 4.87                             | 4.90           | -0.034   |
| 14       | 4.93                             | 4.95           | -0.022   |
| 15       | 5.35                             | 5.40           | -0.047   |
| 16       | 5.77                             | 5.68           | 0.096    |

**Table S4.** The local minima of hybrids 1–16.

| Compound | First area | Second area    | Third area                     | Fourth area    |
|----------|------------|----------------|--------------------------------|----------------|
| 1        | -2.007     | -2.721; -1.905 | -2.231; -3.102; -2.612; -1.088 | -2.993         |
| 2        | -1.905     | -2.721; -2.231 | -2.286; -3.156; -2.612; -1.361 | -2.612         |
| 3        | -1.905     | -2.721; -2.231 | -2.395; -3.156; -2.667; -1.361 | -1.905; -2.395 |
| 4        | -1.905     | -2.721; -2.231 | -2.395; -3.156; -2.721; -1.361 | -1.905; -2.503 |
| 5        | -1.796     | -2.612; -1.796 | -2.068; -2.993; -2.503; -1.143 | -2.721         |
| 6        | -1.796     | -2.503; -1.361 | -2.286; -2.993; -2.612; -1.197 | -2.612         |
| 7        | -1.796     | -2.612; -1.361 | -2.286; -3.102; -2.612; -1.197 | -1.905; -2.503 |
| 8        | -1.796     | -2.612; -1.361 | -2.286; -3.102; -2.612; -1.252 | -1.905; -2.503 |
| 9        | -2.007     | -2.721; -1.905 | -2.231; -3.102; -2.612; -1.088 | -2.993         |
| 10       | -1.905     | -2.721; -2.231 | -2.286; -3.102; -2.612; -1.088 | -2.612         |
| 11       | -1.959     | -2.721; -2.231 | -2.449; -3.156; -2.721; -1.361 | -1.905; -2.503 |
| 12       | -1.959     | -2.721; -2.231 | -2.449; -3.156; -2.721; -1.361 | -1.905; -2.449 |
| 13       | -2.077     | -2.068         | -2.340; -3.102; -2.667; -1.252 | -2.993         |
| 14       | -2.068     | -1.469         | -2.340; -3.102; -2.667; -1.252 | -2.667         |
| 15       | -2.068     | -1.633         | -2.395; -3.102; -2.667; -1.252 | -1.905; -2.340 |
| 16       | -2.068     | -1.469         | -2.395; -3.102; -2.667; -1.361 | -1.905; -2.503 |

**Table S5.** Interaction of hybrids 1, 2, 6, 9, 10, 11 and 14 with active site of Mpro and PL protein.

| Protein. |         | Ligand |                         | Interaction                |              |
|----------|---------|--------|-------------------------|----------------------------|--------------|
| Name     | Residue | Name   | Residue                 | Type                       | Distance (Å) |
| Mpro     | Gly143  | 2      | carbonyl oxygen at C-8q | Conventional hydrogen bond | 2.30         |
|          | His41   |        | chlorine atom           | Carbon hydrogen bond       | 2.97         |
|          | Asn142  |        | carbonyl oxygen at C-8q | Carbon hydrogen bond       | 2.93         |
|          | Asn142  |        | quinoline nitrogen      | Carbon hydrogen bond       | 2.71         |
|          | Cys145  |        | pyridine ring           | $\pi$ -sulfur              | 3.62         |
|          | His41   |        | pyridine ring           | $\pi$ - $\pi$ stacked      | 4.74         |
|          | His41   |        | benzoquinone ring       | $\pi$ - $\pi$ stacked      | 5.73         |
|          | Cys145  |        | benzoquinone ring       | $\pi$ -alkyl               | 4.46         |
|          | Pro168  |        | C-29                    | Alkyl-alkyl                | 3.62         |
|          | Pro168  |        | C-30                    | Alkyl-alkyl                | 4.49         |

|        |               |                         |                            |                            |      |
|--------|---------------|-------------------------|----------------------------|----------------------------|------|
|        | Pro168        | C-12                    | Alkyl-alkyl                | 4.77                       |      |
|        | Pro168        | quinoline nitrogen      | Carbon hydrogen bond       | 3.08                       |      |
|        | Asn142        | triazole ring           | Carbon hydrogen bond       | 3.24                       |      |
|        | Glu166        | triazole ring           | $\pi$ -anion               | 3.23                       |      |
|        | Leu141        | triazole ring           | Amide- $\pi$ stacked       | 4.59                       |      |
|        | Pro168        | pyridine ring           | $\pi$ -alkyl               | 4.96                       |      |
|        | Met49         | 6                       | C-30                       | Alkyl-alkyl                | 5.20 |
|        | Met165        | C-30                    | Alkyl-alkyl                | 5.44                       |      |
|        | Met49         | C-12                    | Alkyl-alkyl                | 3.71                       |      |
|        | Met49         | C-29                    | Alkyl-alkyl                | 4.44                       |      |
|        | Met165        | C-22                    | Alkyl-alkyl                | 4.83                       |      |
|        | His41         | C-30                    | $\pi$ -alkyl               | 4.03                       |      |
|        | Gly143        | carbonyl oxygen at C-8q | Conventional hydrogen bond | 2.17                       |      |
|        | His41         | chlorine atom           | Carbon hydrogen bond       | 3.02                       |      |
|        | Asn142        | carbonyl oxygen at C-8q | Carbon hydrogen bond       | 2.96                       |      |
|        | Asn142        | quinoline nitrogen      | Carbon hydrogen bond       | 2.59                       |      |
|        | Cys145        | pyridine ring           | $\pi$ -sulfur              | 3.55                       |      |
|        | His41         | 10                      | pyridine ring              | $\pi$ - $\pi$ stacked      | 4.80 |
|        | His41         | benzoquinone ring       | $\pi$ - $\pi$ stacked      | 5.66                       |      |
|        | Cys145        | benzoquinone ring       | $\pi$ -alkyl               | 4.42                       |      |
|        | Pro168        | C-29                    | Alkyl-alkyl                | 4.87                       |      |
|        | Pro168        | C-30                    | Alkyl-alkyl                | 4.78                       |      |
|        | Pro168        | C-12                    | Alkyl-alkyl                | 4.81                       |      |
|        | Asn142        | C-28                    | Carbon hydrogen bond       | 3.49                       |      |
|        | Glu166        | triazole ring           | $\pi$ -anion               | 3.01                       |      |
|        | Leu167        | pyridine ring           | Amide- $\pi$ stacked       | 4.28                       |      |
|        | Leu167        | benzoquinone ring       | Amide- $\pi$ stacked       | 4.81                       |      |
|        | Pro168        | pyridine ring           | $\pi$ -Alkyl               | 3.96                       |      |
|        | Pro168        | 11                      | benzoquinone ring          | $\pi$ -Alkyl               | 4.20 |
|        | Met49         | C-30                    | Alkyl-alkyl                | 5.37                       |      |
|        | Met49         | C-12                    | Alkyl-alkyl                | 4.13                       |      |
|        | Met165        | C-29                    | Alkyl-alkyl                | 5.27                       |      |
|        | Met49         | C-29                    | Alkyl-alkyl                | 3.62                       |      |
|        | His41         | C-29                    | $\pi$ -Alkyl               | 3.85                       |      |
|        | Gln189        | triazole ring           | $\pi$ -sigma               | 2.45                       |      |
|        | His41         | pyridine ring           | $\pi$ - $\pi$ -stacked     | 4.53                       |      |
|        | His41         | benzoquinone ring       | $\pi$ - $\pi$ stacked      | 5.36                       |      |
|        | Met165        | 14                      | triazole ring              | $\pi$ -Alkyl               | 4.80 |
|        | Cys145        | pyridine ring           | $\pi$ -Alkyl               | 4.81                       |      |
|        | Cys145        | benzoquinone ring       | $\pi$ -Alkyl               | 4.98                       |      |
|        | Pro168        | C-21                    | Alkyl-alkyl                | 5.11                       |      |
| PLpro  | Thr301        | betulin hydroxyl group  | Conventional hydrogen bond | 2.92                       |      |
|        | Asn267        | carbonyl oxygen at C-8q | Carbon hydrogen bond       | 2.63                       |      |
|        | Tyr268        | triazole ring           | $\pi$ -sigma               | 2.62                       |      |
|        | Tyr268        | triazole ring           | $\pi$ - $\pi$ T-shaped     | 5.42                       |      |
|        | Pro248        | 1                       | pyridine ring              | Alkyl-alkyl                | 4.22 |
|        | Pro248        | benzoquinone ring       | Alkyl-alkyl                | 4.27                       |      |
|        | Pro248        | C-24                    | $\pi$ -alkyl               | 4.11                       |      |
|        | Pro248        | C-23                    | $\pi$ -alkyl               | 4.21                       |      |
|        | Leu162        | C-16                    | Alkyl-alkyl                | 4.78                       |      |
|        | Arg166        | 6                       | betulin carbonyl group     | Conventional hydrogen bond | 2.16 |
| Tyr268 | triazole ring | $\pi$ - $\pi$ T-shaped  | 5.38                       |                            |      |

|        |    |                         |                            |      |
|--------|----|-------------------------|----------------------------|------|
| Pro247 |    | benzoquinone ring       | Amide- $\pi$ stacked       | 5.56 |
| Pro248 |    | pyridine ring           | Alkyl-alkyl                | 4.40 |
| Pro248 |    | benzoquinone ring       | Alkyl-alkyl                | 4.47 |
| Pro248 |    | C-24                    | $\pi$ -alkyl               | 4.13 |
| Pro248 |    | C-23                    | $\pi$ -alkyl               | 3.80 |
| Leu162 |    | C-16                    | Alkyl-alkyl                | 4.63 |
| Leu162 |    | C-22                    | Alkyl-alkyl                | 5.16 |
| Arg166 |    | betulin hydroxyl group  | Conventional hydrogen bond | 2.20 |
| Tyr268 |    | triazole ring           | Carbon hydrogen bond       | 2.10 |
| Tyr268 |    | triazole ring           | $\pi$ - $\pi$ T-shaped     | 4.96 |
| Pro248 |    | pyridine ring           | $\pi$ -alkyl               | 4.55 |
| Pro248 | 9  | benzoquinone ring       | $\pi$ -alkyl               | 5.14 |
| Pro248 |    | C-24                    | Alkyl-alkyl                | 4.42 |
| Pro248 |    | C-23                    | Alkyl-alkyl                | 4.54 |
| Leu162 |    | C-21                    | Alkyl-alkyl                | 5.22 |
| Leu162 |    | C-16                    | Alkyl-alkyl                | 4.77 |
| Lys157 |    | carbonyl oxygen at C-5q | Conventional hydrogen bond | 2.17 |
| Lys157 |    | oxygen at C-7q          | Conventional hydrogen bond | 2.32 |
| Gly163 |    | carbonyl oxygen at C-5q | Carbon hydrogen bond       | 2.82 |
| Leu162 |    | benzene ring            | $\pi$ -alkyl               | 4.75 |
| Leu162 |    | benzoquinone ring       | $\pi$ -alkyl               | 4.07 |
| Pro248 | 14 | C-26                    | Alkyl-alkyl                | 4.33 |
| Pro248 |    | C-12                    | Alkyl-alkyl                | 4.99 |
| Pro248 |    | C-6                     | Alkyl-alkyl                | 3.81 |
| Met208 |    | C-30                    | Alkyl-alkyl                | 5.46 |
| Tyr264 |    | C-26                    | $\pi$ -alkyl               | 5.29 |
| Tyr264 |    | C-16                    | $\pi$ -alkyl               | 4.08 |

Figure S1. The optimized structure of hybrids 1-16.

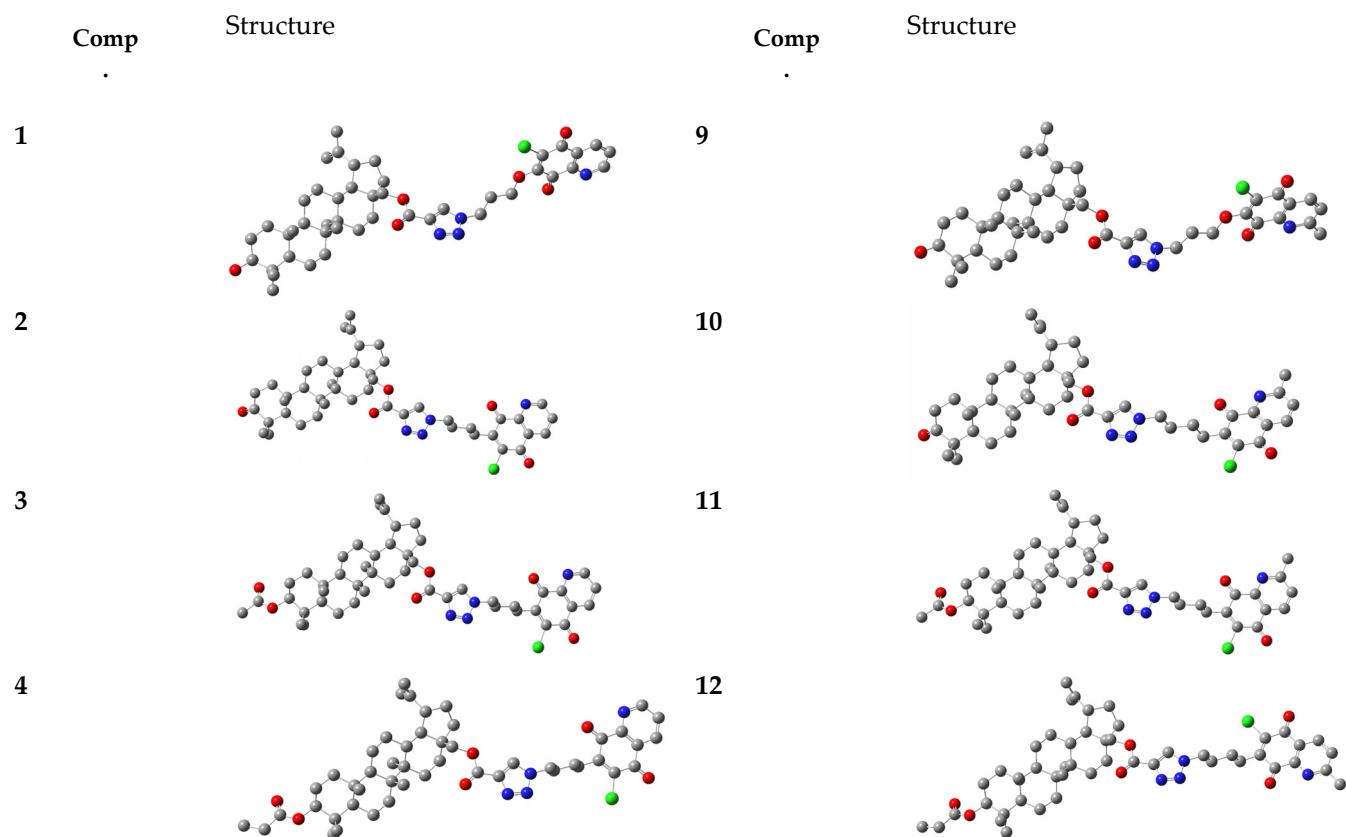

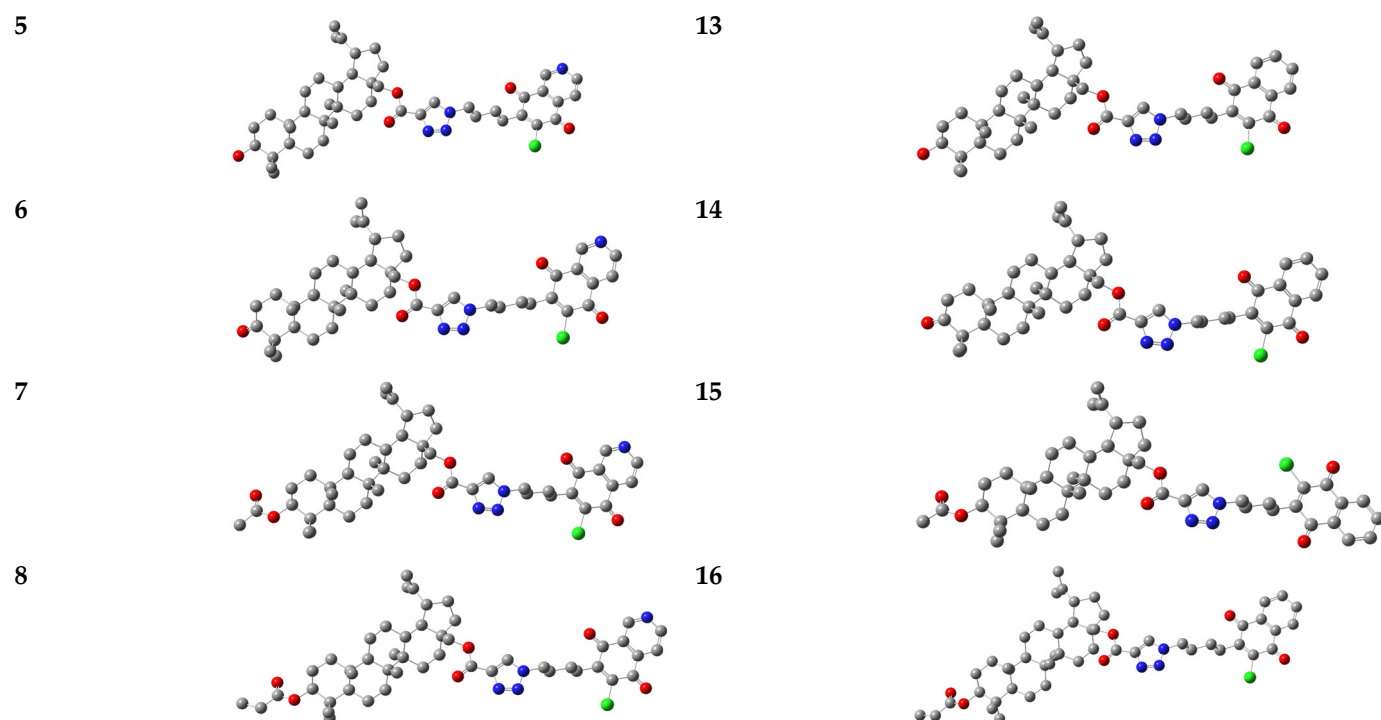

**Figure S2.** The linear regression between the experimental and literature lipophilicity for standard substance.

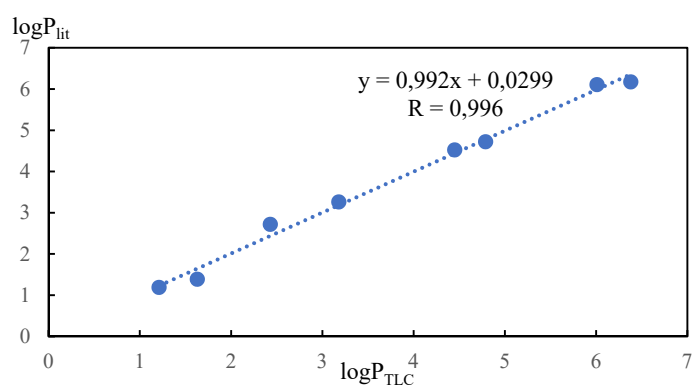

**Figure S3.** The similarity analysis of pharmacokinetic parameters of hybrids **1–16**.

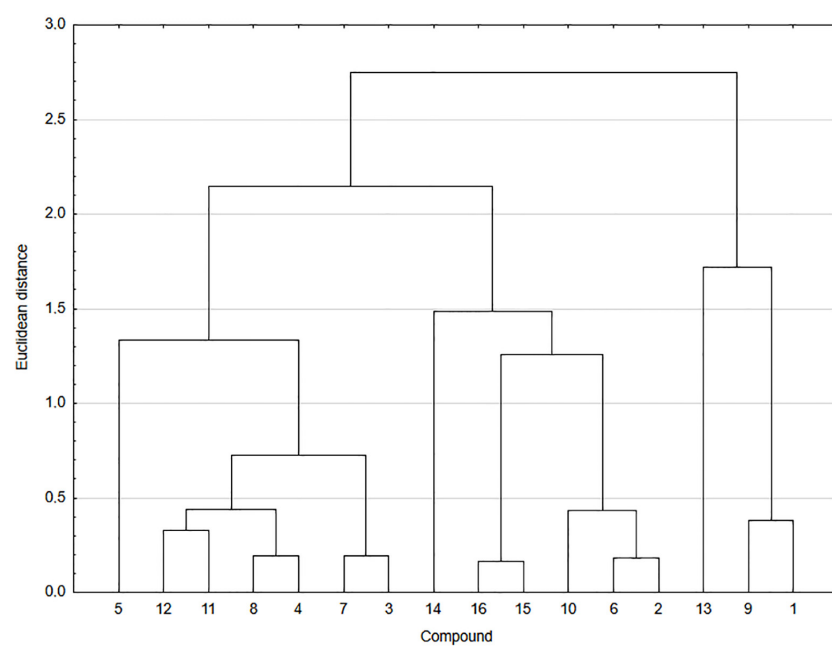

**Figure S4.** The HOMO and LUMO orbitals for hybrids **1–16**.

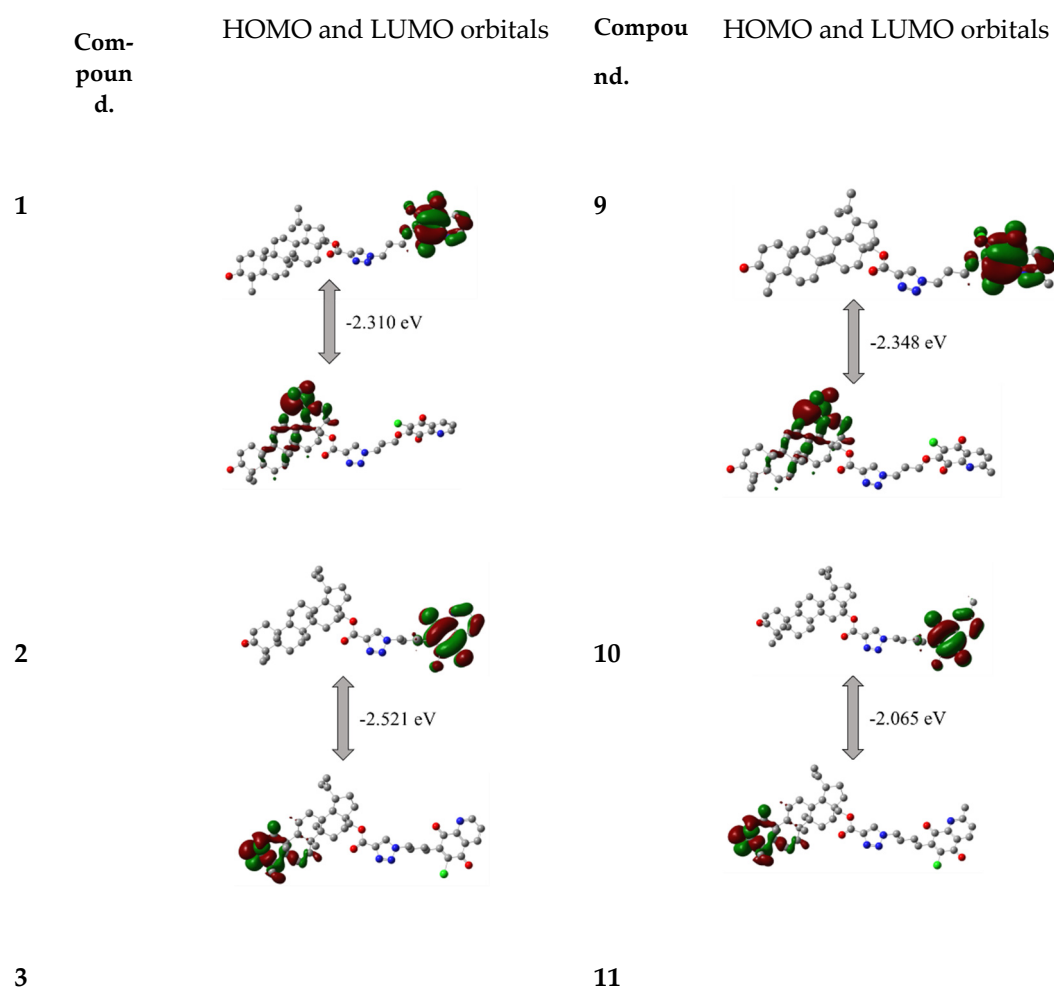

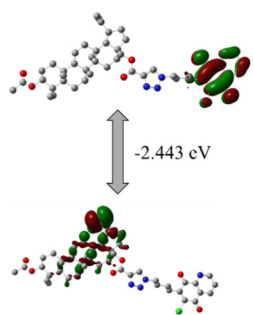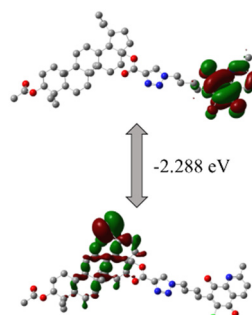

4

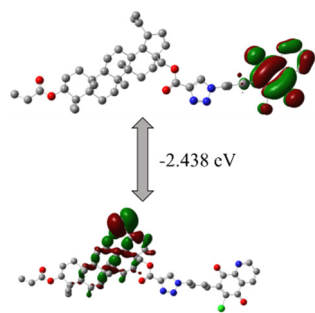

12

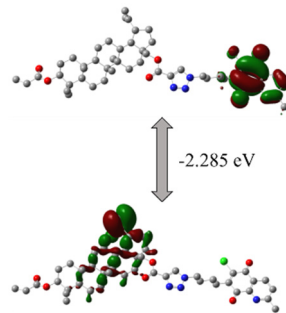

5

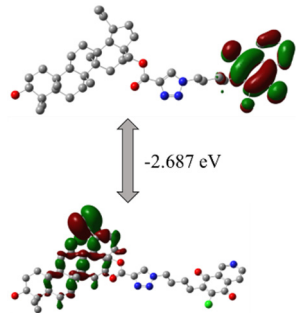

13

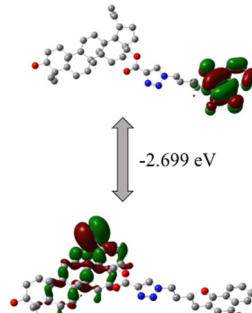

6

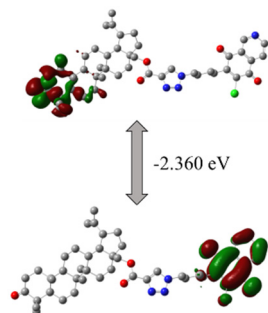

14

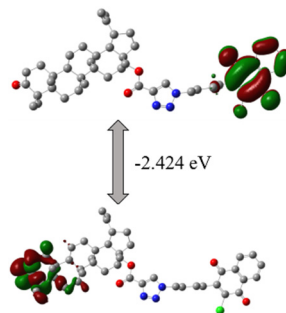

7

15



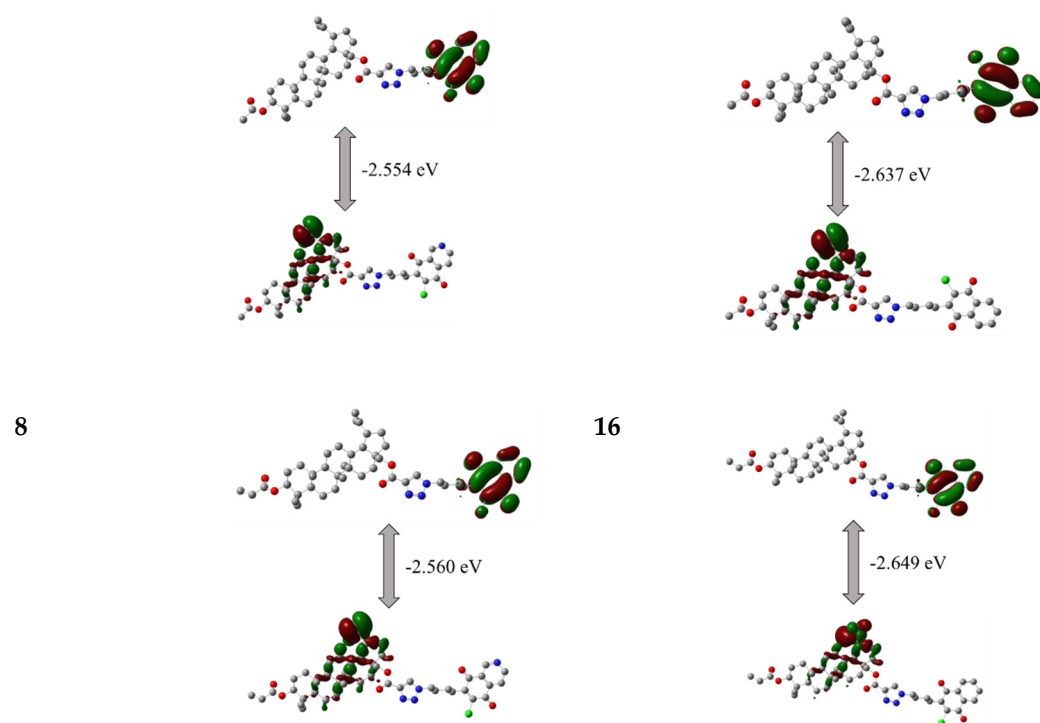

Figure S5. The MEP for hybrids 1–16.

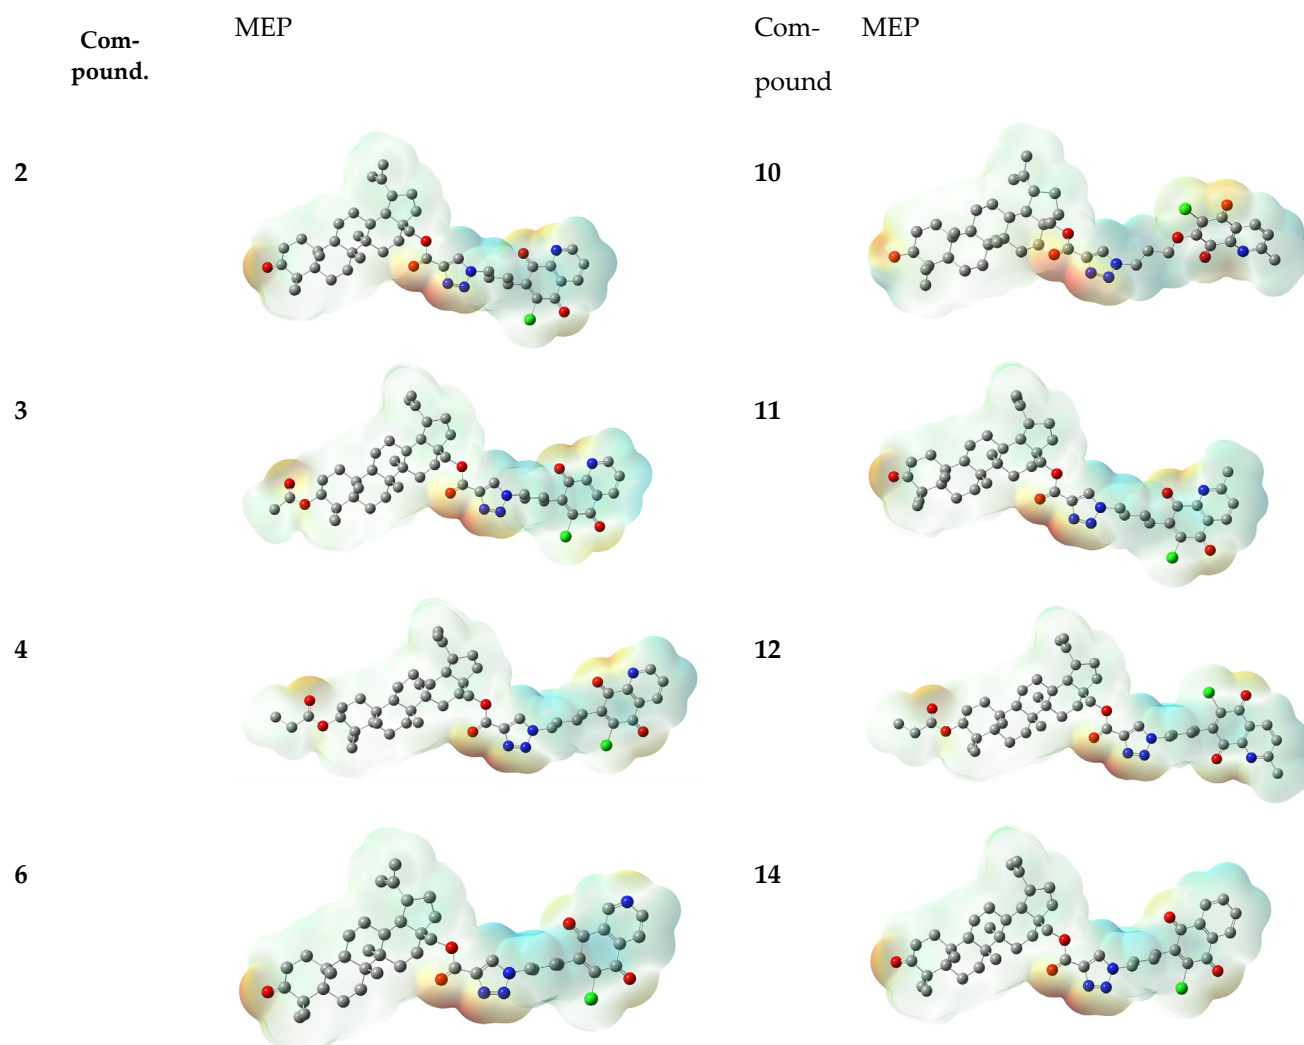

7

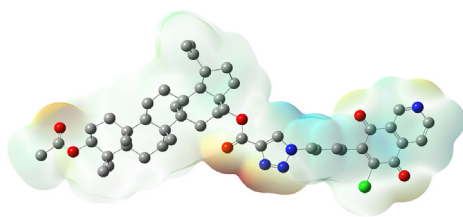

15

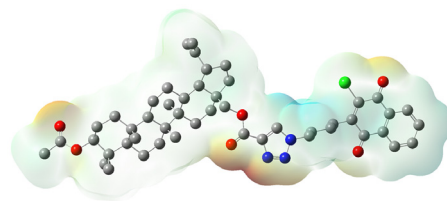

8

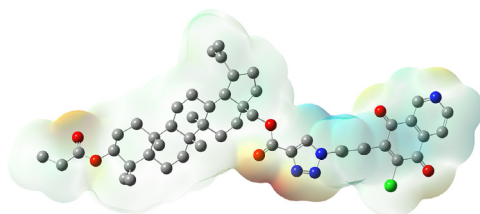

16

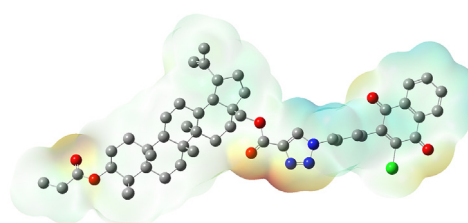

**Figure S6.** Docking pose of COVID-19 Mpro protein complex with hybrids 2 (A.), 6 (B.), 10 (C.), 11 (D.), and 14 (E.).

A.

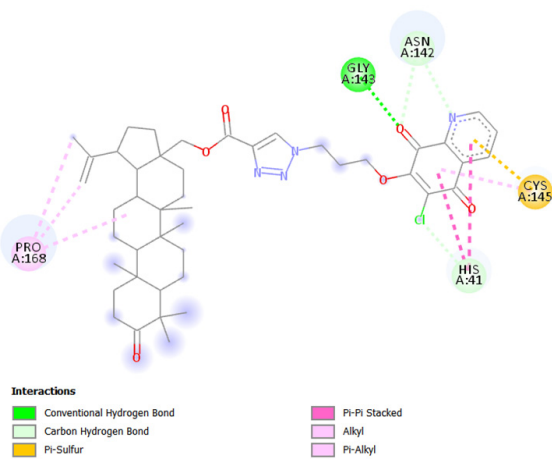

B.

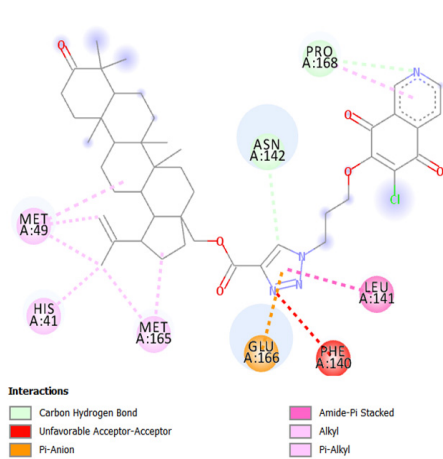

C.

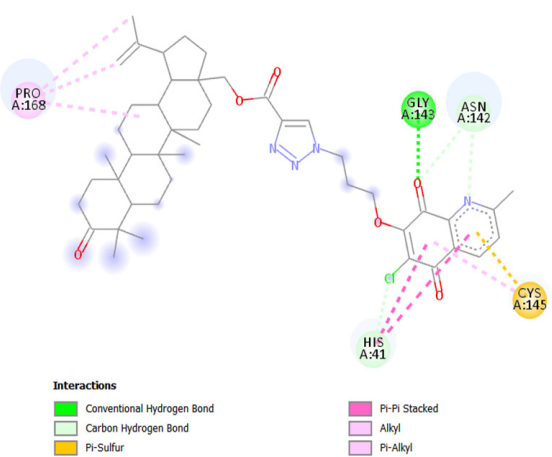

D.

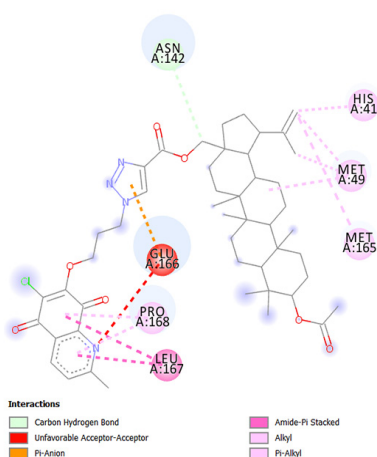

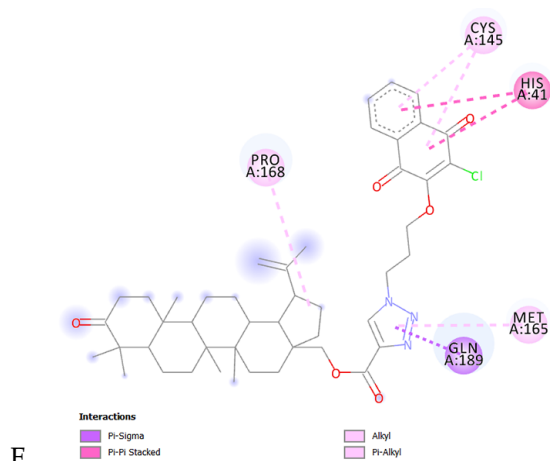

**Figure S7.** Docking pose of COVID-19 PLpro protein complex with hybrids **1** (A.), **6** (B.), **9** (C.), and **14** (D.).

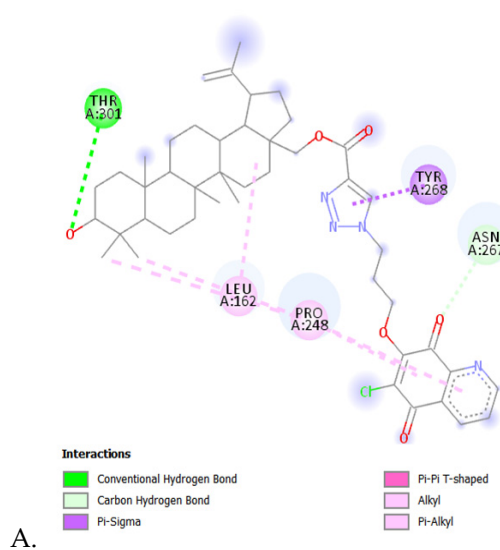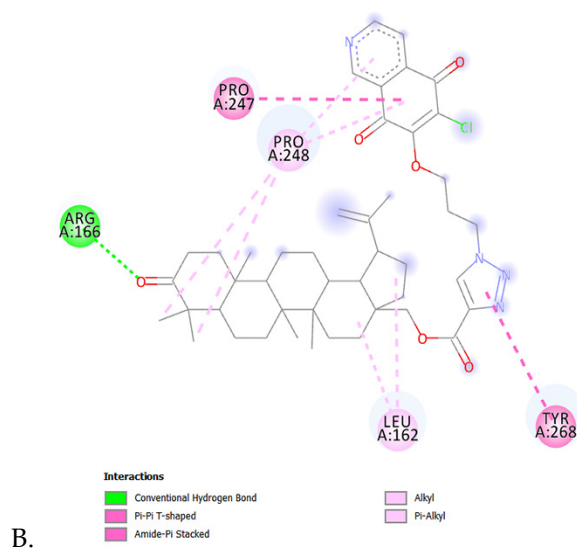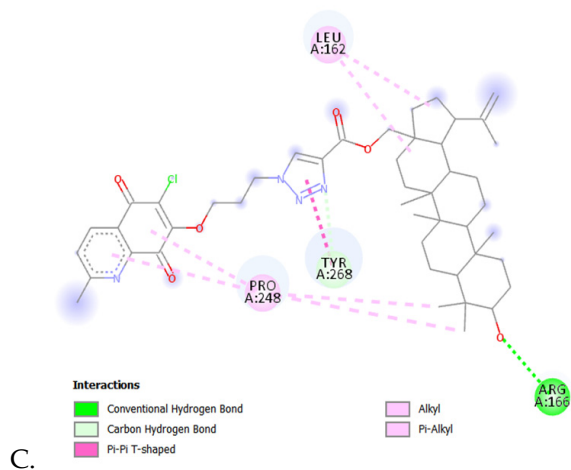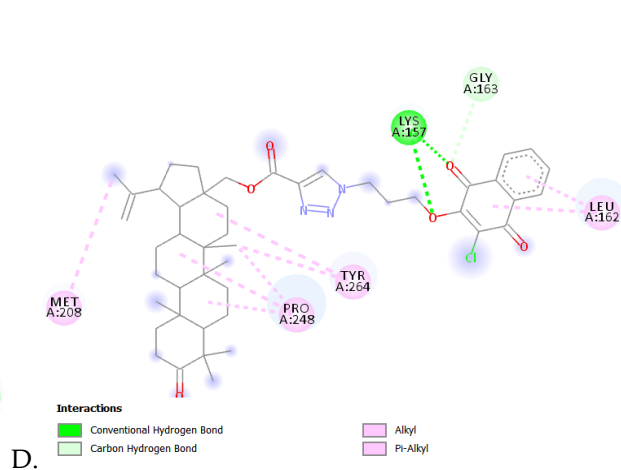

Supplement: s1 [file s1]
